# Supplementary material for: The primary transcriptome of the marine diazotroph Trichodesmium erythraeum IMS101
Source: PubMed Central journal article supplement — Sci Rep. 2014 Aug 26;4:6187. doi: 10.1038/srep06187 (PMC4143802; doi:10.1038/srep06187), 2014-08-26
Supplement: srep06187-s1.pdf [file srep06187-s1.pdf]

# Supplementary Figures

**The primary transcriptome of the marine diazotroph *Trichodesmium erythraeum* IMS101**

Ulrike Pfreundt, Matthias Kopf, Natasha Belkin, Ilana Berman-Frank and  
Wolfgang R. Hess

**Supplementary Figure S1 Cumulative read count of TSS ranked in decreasing order.** The accumulated read count for all nTSS are shown in red, for all gTSS in blue. One TSS corresponds to one data point.

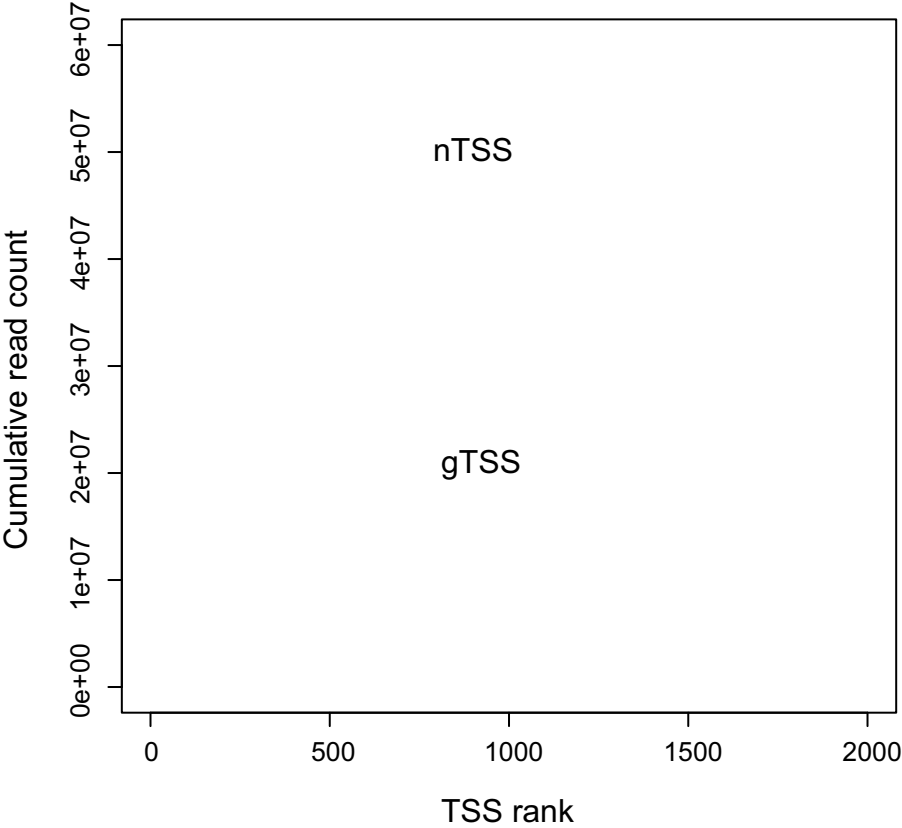

**Supplementary Figure S2 Technical information.** Full images of RNA membranes presented in Figure 3 B (repeat 0, repeat 1-6), Figure 3 C (ncr1753291 - ncr6950581), Figure 4 (CRISPR probe1), Figure 5 (apcD intron), and Figure 6 (DGR\_TR) with ethidium bromide staining on the left side (column a; visible are rRNAs, tRNAs) and after northern hybridization on the right side (column b). Please note that ethidium bromide fades with time, which is why some bands are less clear in column a. The probe used is written underneath the northern blot image. In column a, the first lane is always the marker (RiboRuler Low Range), the commercial gel image for this marker can be seen at the end of this document. The respective lane of each blot that was used in the manuscript figures is indicated by a star. In most cases, the lane with RNA from standard lab growth conditions was used. Where a different lane was used, the condition is given. This was only done when there was no difference to the lane from standard conditions, but the bands appeared clearer. The information provided here is solely to prove that the manuscript figures are not manipulated.

a

b

- corresponding to Figure 3 B

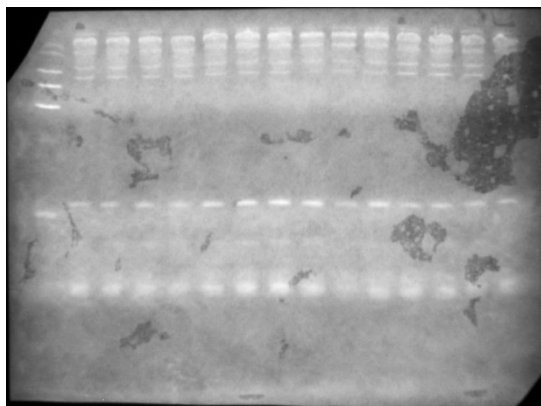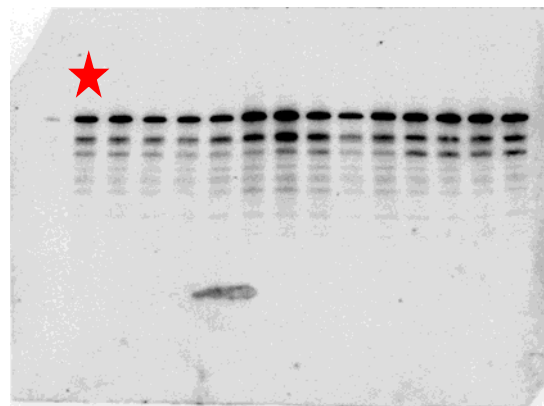

repeat 0

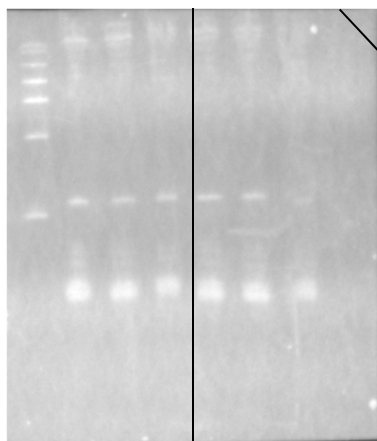

membrane was cut into two halves

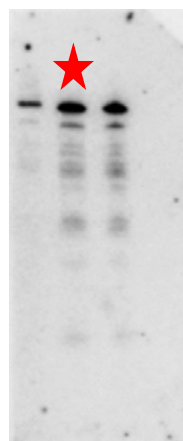

repeat 1-6

a

b

- corresponding to Figure 3 C (all following blots)

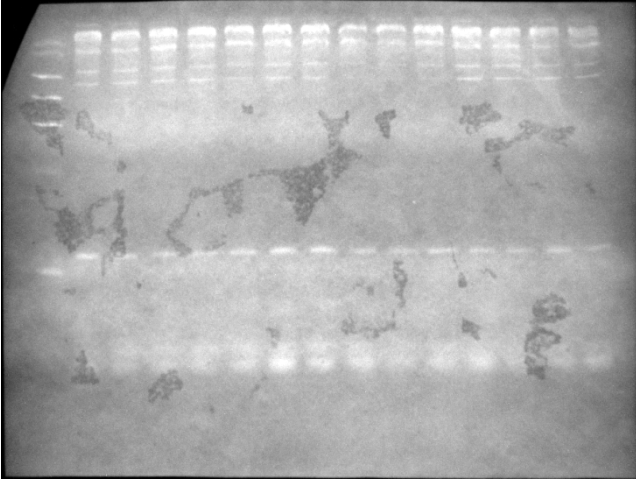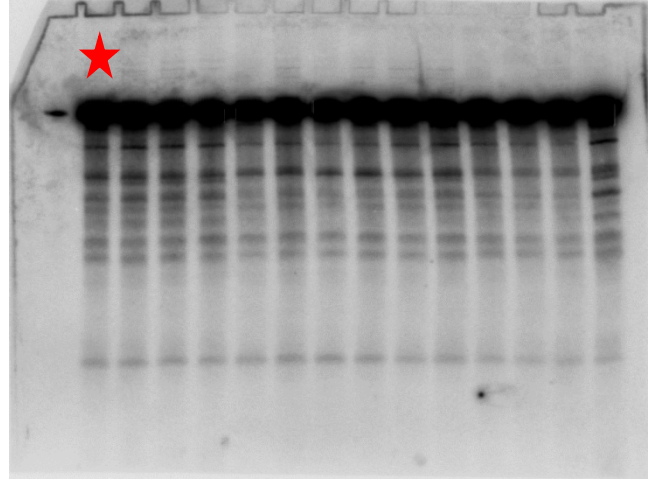

ncr1753291

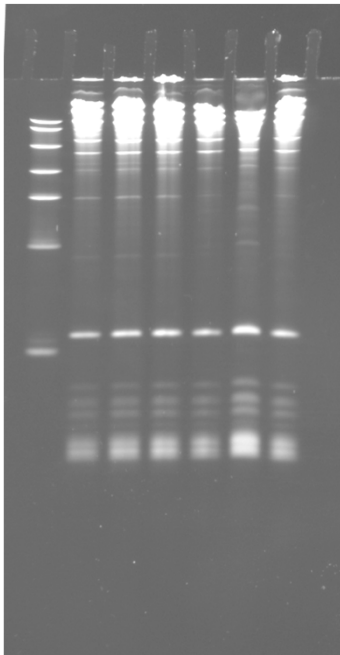

exception: gel image  
instead of membrane  
image

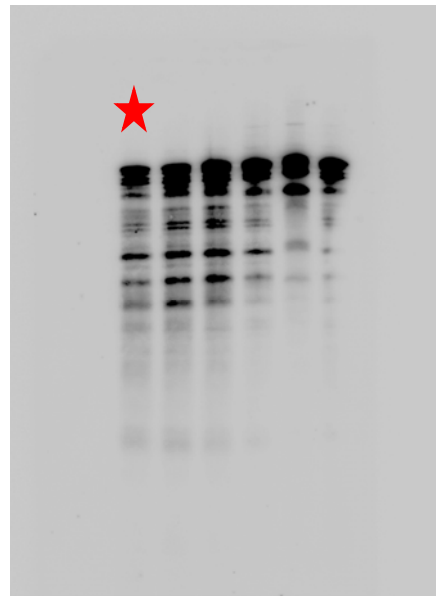

ncr1907319

a

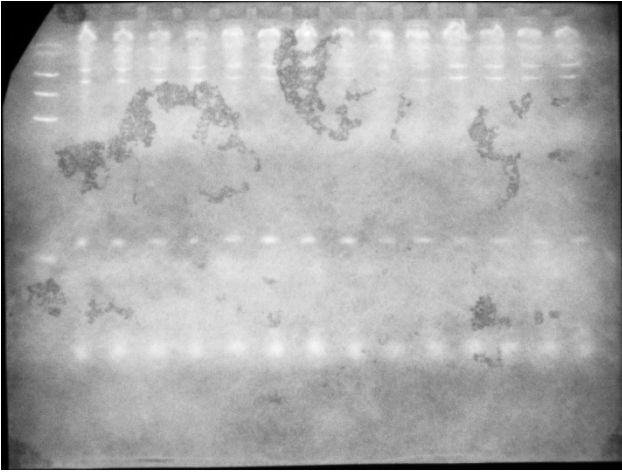

b

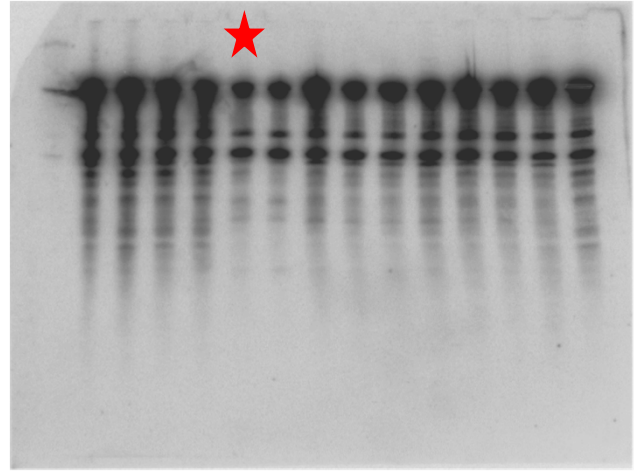

ncr6410109

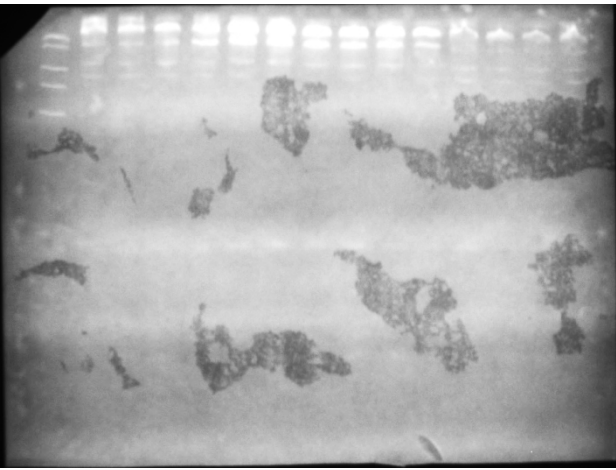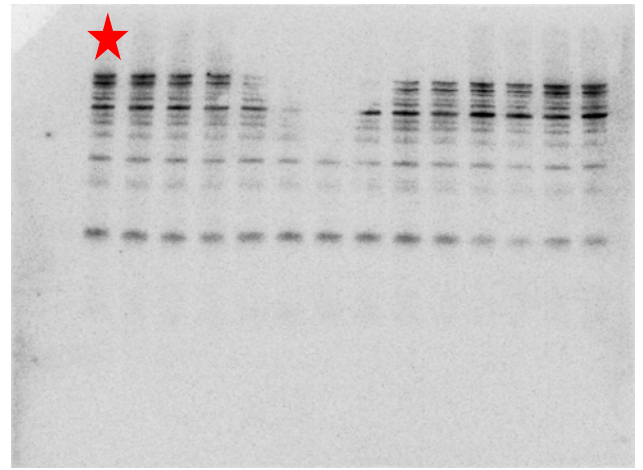

ncr4997269

-P medium (7h)

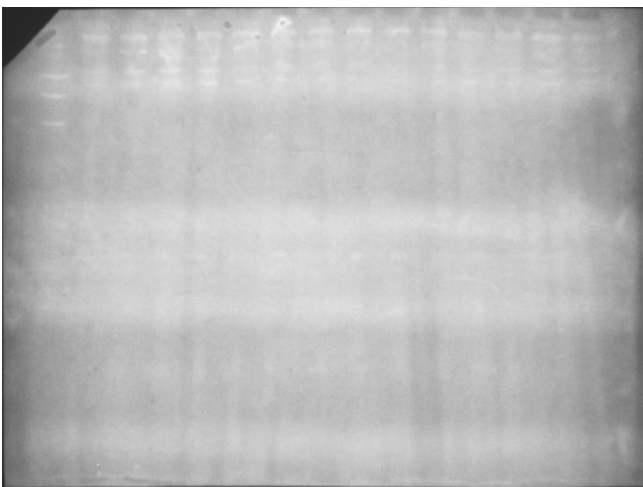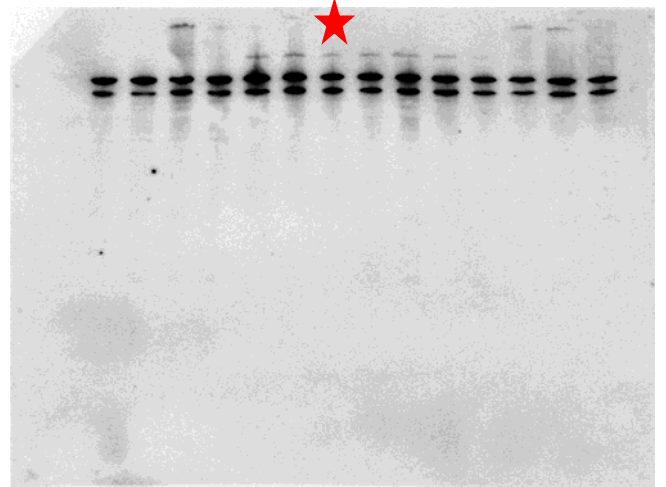

ncr3647195



a

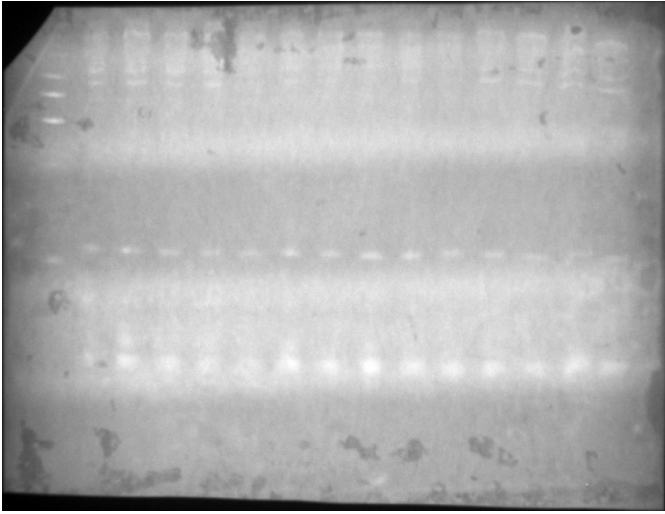

b

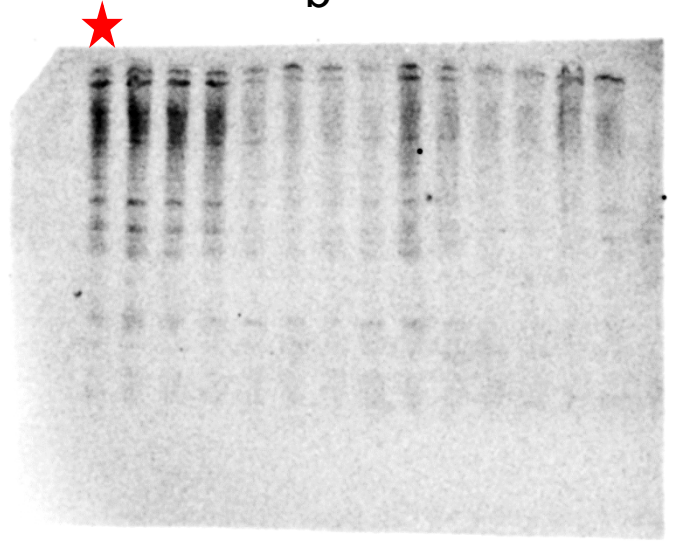

ncr5610167

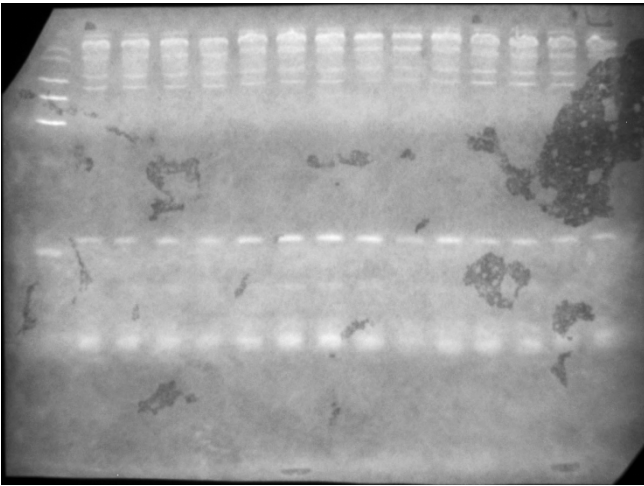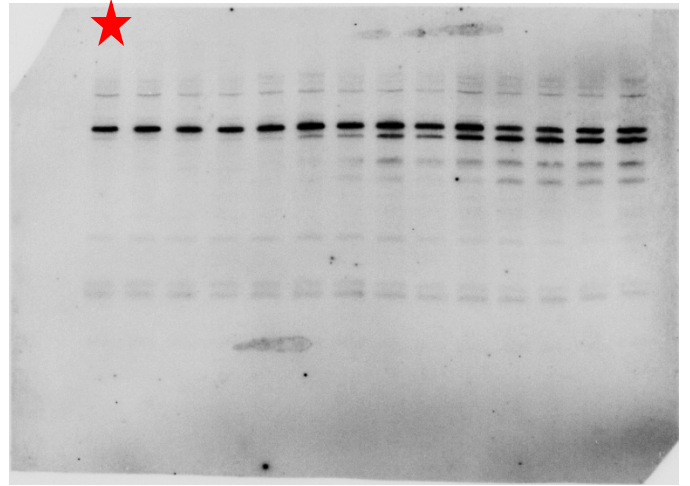

ncr6950581 (membrane 2nd use)

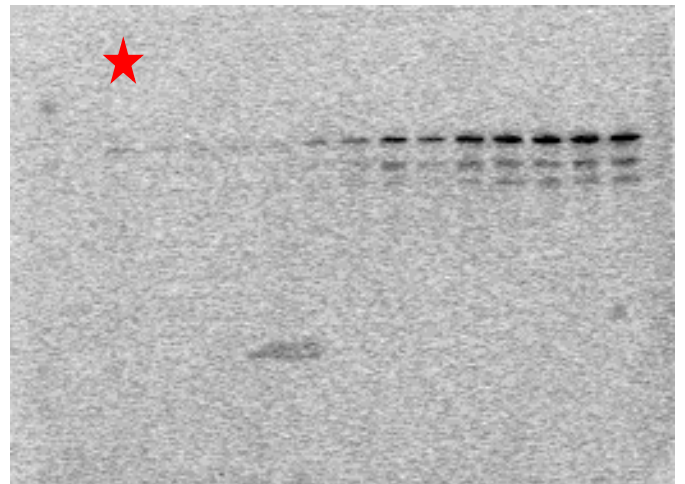

residual signal on membrane from 1st use  
(to be subtracted from the above membrane)

a

- corresponding to Figure 4

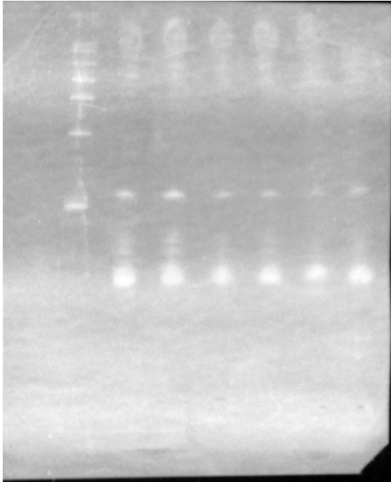

b

duplicates of 30 | 37 | 43 psu salt

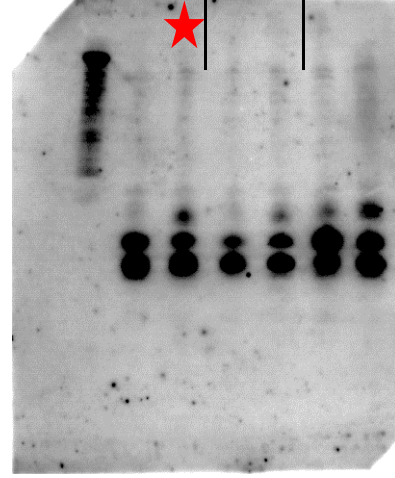

CRISPR probe 1

- corresponding to Figure 5

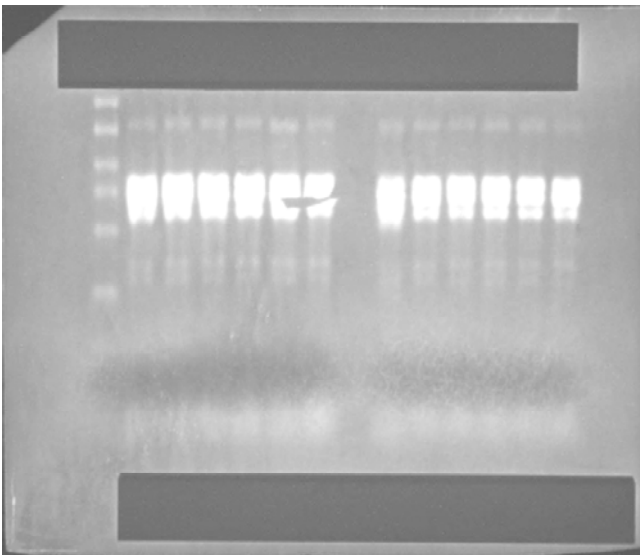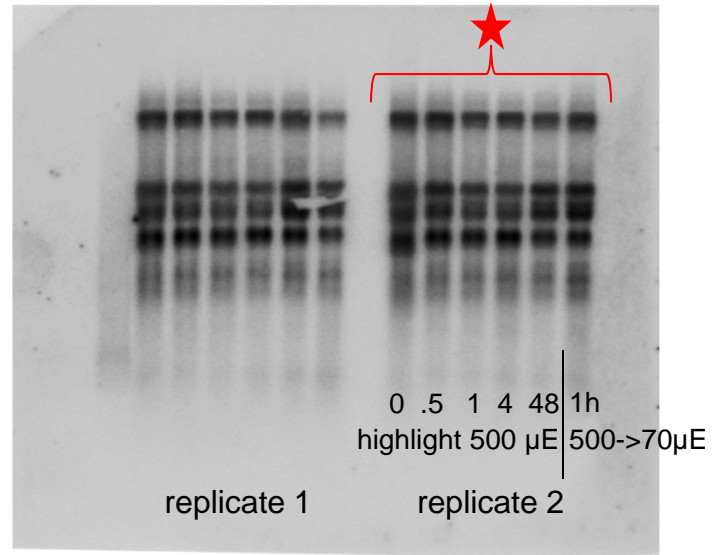

*apcD* intron and mRNA

- corresponding to Figure 6

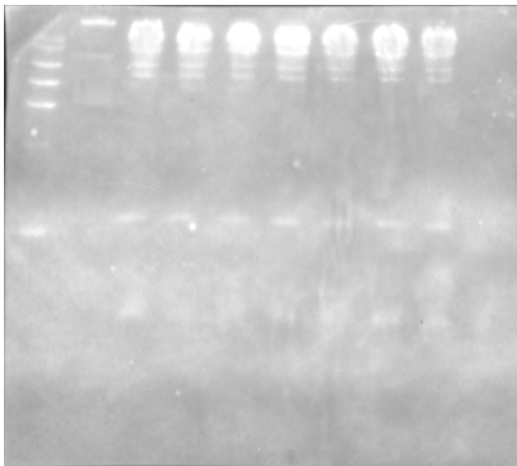

low light (48h)

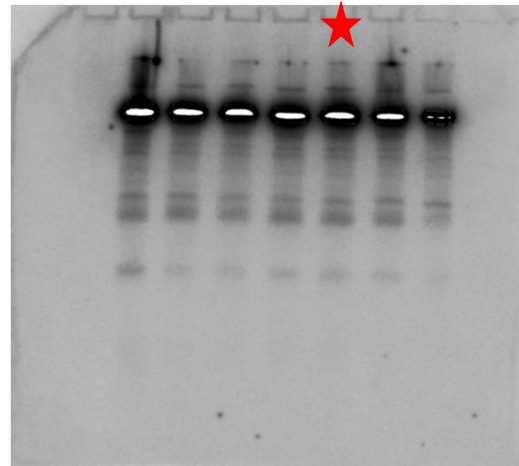

DGR\_TR

## RNA marker

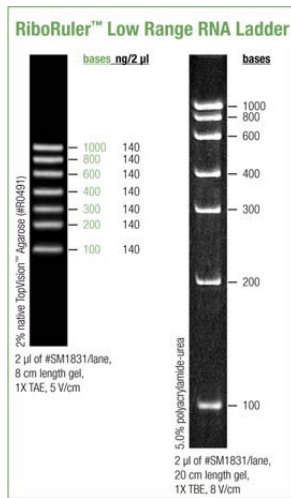

This marker (RiboRuler Low Range) was used for all gels, from which membranes were prepared. The 200 nt band is generally weaker.
